# Supplementary material for: New Antimicrobial Resistance Strategies: An Adaptive Resistance Network Conferring Reduced Glycopeptide Susceptibility in VISA
Source: MDPI journal article supplement (doi:10.3390/antibiotics12040783), 2023-04-19
Supplement: s1 [file s1]

**Figure S1. Validation of *sucA* asRNA**

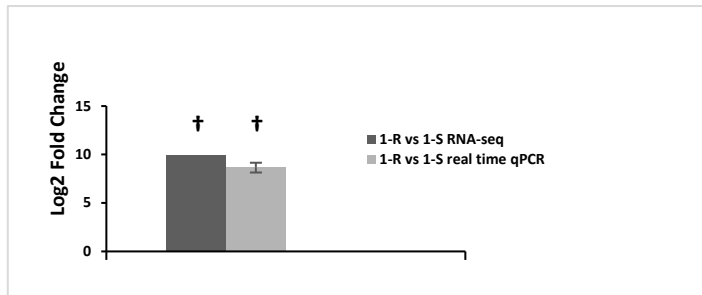

†: Statistically significant difference

**Table S1. DEGs and asRNAs in targets putatively related to glycopeptide resistance in VISA CA-MRSA**

| NAME                                                           | SYNON.        | PRODUCT                                                                                                      | Strand | Transcr. Start | Transl. Start  | Transl. Stop   | Trans. Stop    | asRNA type           | RPKM 1S   | EXP 1S    | RPKM 1R     | EXP 1R      | qValue           | EXP TREND RATE 1R vs 1S |
|----------------------------------------------------------------|---------------|--------------------------------------------------------------------------------------------------------------|--------|----------------|----------------|----------------|----------------|----------------------|-----------|-----------|-------------|-------------|------------------|-------------------------|
| <b>Cell wall biosynthesis</b>                                  |               |                                                                                                              |        |                |                |                |                |                      |           |           |             |             |                  |                         |
| <b>murF</b>                                                    | <b>MW2005</b> | <b>UDP-N-acetylmuramoylalanyl-D-glutamyl-2, 6-diaminopimelate-D-alanyl-D-alanyl ligase</b>                   | -      |                | <b>2166005</b> | <b>2164647</b> |                |                      | <b>0</b>  | <b>0</b>  | <b>36</b>   | <b>59</b>   | <b>0</b>         | <b>↑</b>                |
| -                                                              | Predicted RNA | Antisense: murF                                                                                              | +      | 2164976        |                |                | 2164998        | cis-asRNA (~3' end)  | 761       | 1136      | 0           | 0           | 0                | ↓↓↓                     |
| -                                                              | Predicted RNA | Antisense: murT Lipid II D-glutamate to an isoglutamine                                                      | +      | 1994502        |                |                | 1994528        | cis-asRNA (internal) | 761       | 1136      | 0           | 0           | 0                | ↓↓↓                     |
| -                                                              | Predicted RNA | Antisense: murT Lipid II D-glutamate to an isoglutamine                                                      | +      | 1995323        |                |                | 1995345        | cis-asRNA (internal) | 761       | 1136      | 0           | 0           | 0                | ↓↓↓                     |
| <b>Peptidoglycan aminoacids</b>                                |               |                                                                                                              |        |                |                |                |                |                      |           |           |             |             |                  |                         |
| <b>ddl</b>                                                     | <b>MW2006</b> | <b>D-alanyl-alanine synthetase A</b>                                                                         | -      |                | <b>2167090</b> | <b>2166020</b> |                |                      | <b>17</b> | <b>25</b> | <b>0</b>    | <b>0</b>    | <b>0</b>         | <b>↓</b>                |
| -                                                              | Predicted RNA | Antisense: ddl                                                                                               | +      | 2166814        |                |                | 2166837        | cis-asRNA (~5' end)  | 1522      | 2272      | 0           | 0           | 0                | ↓↓↓                     |
| <b>murI</b>                                                    | <b>MW1033</b> | <b>Glutamate racemase (L-glutamate in D-glutamate)</b>                                                       | +      |                | <b>1132077</b> | <b>1132877</b> |                |                      | <b>27</b> | <b>41</b> | <b>0</b>    | <b>0</b>    | <b>0</b>         | <b>↓</b>                |
| <b>alr</b>                                                     | <b>MW1994</b> | <b>Alanine racemase (L-ala in D-ala)</b>                                                                     | -      |                | <b>2151144</b> | <b>2149996</b> |                |                      | <b>22</b> | <b>33</b> | <b>0</b>    | <b>0</b>    | <b>0</b>         | <b>↓</b>                |
| <b>dapD</b>                                                    | <b>MW1285</b> | <b>Tetrahydroadipyl acetyltransferase (L-lysine biosynthesis via DAP)</b>                                    | +      |                | <b>1405382</b> | <b>1406101</b> |                |                      | <b>25</b> | <b>37</b> | <b>0</b>    | <b>0</b>    | <b>0</b>         | <b>↓</b>                |
| -                                                              | Predicted RNA | Antisense: dapE (L-lysine biosynthesis via DAP)                                                              | -      | <b>2093354</b> |                |                | <b>2093327</b> | cis-asRNA (~3' end)  | <b>0</b>  | <b>0</b>  | <b>3258</b> | <b>5293</b> | <b>0</b>         | <b>↑↑↑</b>              |
| <b>hutI</b>                                                    |               | <b>hutI (L-lysine) (degradation of L-histidine into L-glutamate)</b>                                         | -      |                | <b>2398595</b> | <b>2397357</b> |                |                      | <b>27</b> | <b>40</b> | <b>0</b>    | <b>0</b>    | <b>0</b>         | <b>↓</b>                |
| <b>hutG</b>                                                    |               | <b>hutG (L-lysine) (degradation of L-histidine into L-glutamate)</b>                                         | -      |                | <b>2402728</b> | <b>2401793</b> |                |                      | <b>0</b>  | <b>0</b>  | <b>49</b>   | <b>80</b>   | <b>0</b>         | <b>↑</b>                |
| -                                                              | Predicted RNA | Antisense: hutH (L-Lysine) (L-histidine degradation into L-glutamate)                                        | -      | 12338          |                |                | 12310          | cis-asRNA (~3' end)  | 761       | 1136      | 0           | 0           | 0                | ↓↓↓                     |
| <b>mgo1</b>                                                    | <b>MW2286</b> | <b>Malate:quinone oxidoreductase Mgo1 (oxalacetate substrate for lysine biosynthesis)</b>                    | -      |                | <b>2433407</b> | <b>2431872</b> |                |                      | <b>0</b>  | <b>0</b>  | <b>28</b>   | <b>47</b>   | <b>1,04E-19</b>  | <b>↑</b>                |
| -                                                              | Predicted RNA | Antisense: mgo2                                                                                              | +      | 2690445        |                |                | 2690497        | cis-asRNA (~3' end)  | 0         | 0         | 736         | 1196        | 0                | ↑↑↑                     |
| -                                                              | Predicted RNA | Antisense: mgo2                                                                                              | +      | 2690834        |                |                | 2690887        | cis-asRNA (~3' end)  | 0         | 0         | 600         | 975         | 8,22E-03         | ↑↑↑                     |
| -                                                              | Predicted RNA | Antisense: mgo2                                                                                              | +      | 2691351        |                |                | 2691488        | cis-asRNA (~5' end)  | 0         | 0         | 390         | 634         | 0                | ↑↑                      |
| <b>Biosynthesis of the peptidoglycan amino sugar precursor</b> |               |                                                                                                              |        |                |                |                |                |                      |           |           |             |             |                  |                         |
|                                                                | predicted RNA | antisense: glmU NAG biosynthesis                                                                             | -      | 513199         |                |                | 513178         | cis-asRNA (internal) | 761       | 1136      | 0           | 0           | 0                | ↓↓↓                     |
| <b>Biosynthesis TA</b>                                         |               |                                                                                                              |        |                |                |                |                |                      |           |           |             |             |                  |                         |
| <b>tarJ</b>                                                    | <b>MW0228</b> | <b>tarJ: biosynthesis of poly(ribitol phosphate) teichoic acid</b>                                           | +      |                | <b>271614</b>  | <b>272639</b>  |                |                      | <b>36</b> | <b>54</b> | <b>0</b>    | <b>0</b>    | <b>1,05E-113</b> | <b>↓</b>                |
| <b>mnaA</b>                                                    | <b>MW2035</b> | <b>UDP-GlcNAc 2-epimerase (UDP-N-acetylglucosamine (UDP-GlcNAc) in UDP-N-acetylmannosamine (UDP-ManNAc))</b> | -      |                | <b>2190015</b> | <b>2188885</b> |                |                      | <b>0</b>  | <b>0</b>  | <b>34</b>   | <b>56</b>   | <b>0</b>         | <b>↑</b>                |
| -                                                              | Predicted RNA | Antisense: mnaA                                                                                              | +      | <b>2189088</b> |                |                | <b>2189116</b> | cis-asRNA (~3' end)  | <b>0</b>  | <b>0</b>  | <b>1497</b> | <b>2432</b> | <b>3,50E-15</b>  | <b>↑↑↑</b>              |
| -                                                              | Predicted RNA | Antisense: mnaA                                                                                              | +      | 2189792        |                |                | 2189825        | cis-asRNA (~5' end)  | 1522      | 2272      | 0           | 0           | 0                | ↓↓↓                     |

|                                   |               |                                                                                                   |   |         |         |         |         |                                              |      |      |      |      |           |     |
|-----------------------------------|---------------|---------------------------------------------------------------------------------------------------|---|---------|---------|---------|---------|----------------------------------------------|------|------|------|------|-----------|-----|
| -                                 | Predicted RNA | Antisense: ispD (tar11): biosynthesis of poly(ribitol phosphate)<br>Biosynthesis of teichoic acid | - | 277261  |         |         | 277236  | cis-asRNA (~3' end)                          | 761  | 1136 | 0    | 0    | 0         | ↓↓↓ |
| -                                 | Predicted RNA | antisense: ispD (tar11) –<br>Poly(ribitol phosphate) teichoic acid biosynthesis                   | - | 277499  |         |         | 277480  | cis-asRNA(~3' end)                           | 761  | 1136 | 0    | 0    | 2,97E-08  | ↓↓↓ |
| <b>Biosynthesis of LTA</b>        |               |                                                                                                   |   |         |         |         |         |                                              |      |      |      |      |           |     |
| -                                 | Predicted RNA | Antisense: MW0681 lipoteicocic acid synthetase ltaS                                               | - | 761881  |         |         | 761850  | trans-acting sRNA<br>ltaS (UTR5' and 5' end) | 761  | 1136 | 0    | 0    | 0         | ↓↓↓ |
| <b>Charge of the cellenvelope</b> |               |                                                                                                   |   |         |         |         |         |                                              |      |      |      |      |           |     |
| dltA                              | MW0814        | D-alanine–poly(phosphoribitol) ligase subunit 1                                                   | + |         | 898360  | 899817  |         |                                              | 0    | 0    | 83   | 135  | 0         | ↑↑  |
| dltD                              | MW0817        | Poly D-alanine transfer protein (glycerophosphate chain)                                          | + |         | 901279  | 902454  |         |                                              | 18   | 27   | 0    | 0    | 0         | ↓   |
| fmcT/mprF                         | MW1247        | Oxacillin resistance-related FmcT/MprF protein                                                    | + |         | 1365602 | 1368124 |         |                                              | 0    | 0    | 23   | 38   | 0         | ↑   |
| -                                 | Predicted RNA | Antisense: fmcT/mprF                                                                              | - | 1365760 |         |         | 1365737 | cis-asRNA (~ 5' end)                         | 761  | 1136 | 0    | 0    | 0         | ↓↓↓ |
| -                                 | Predicted RNA | Antisense: fmcT/mprF                                                                              | - | 1366276 |         |         | 1366249 | cis-asRNA (~ 5' end)                         | 1522 | 2272 | 0    | 0    | 0         | ↓↓↓ |
| <b>Autolysins</b>                 |               |                                                                                                   |   |         |         |         |         |                                              |      |      |      |      |           |     |
| -                                 | Predicted RNA | Antisense: atl                                                                                    | + | 1031027 |         |         | 1031048 | cis-asRNA (~3' end)                          | 761  | 1136 | 0    | 0    | 0         | ↓↓↓ |
| -                                 | Predicted RNA | Antisense: sceD                                                                                   | + | 2177015 |         |         | 2177035 | cis-asRNA sceD 5'end                         | 761  | 1136 | 0    | 0    | 0         | ↓↓↓ |
| -                                 | Predicted RNA | Antisense: isaA                                                                                   | + | 2657852 |         |         | 2657876 | cis-asRNA (internal)                         | 0    | 0    | 1649 | 2678 | 0         | ↑↑↑ |
| -                                 | Predicted RNA | Antisense: isaA                                                                                   | + | 2658100 |         |         | 2658160 | cis-asRNA (~5' end)                          | 0    | 0    | 603  | 980  | 0         | ↑↑↑ |
| <b>Cell division</b>              |               |                                                                                                   |   |         |         |         |         |                                              |      |      |      |      |           |     |
| ftsY                              | MW1118        | Signal recognition particle FtsY                                                                  | + |         | 1220509 | 1221759 |         |                                              | 12   | 19   | 0    | 0    | 0         | ↓   |
| -                                 | Predicted RNA | Antisense: ftsL                                                                                   | - | 1157544 |         |         | 1157522 | cis-asRNA(internal)                          | 0    | 0    | 1649 | 2678 | 0         | ↑↑↑ |
| -                                 | Predicted RNA | Antisense: ftsA                                                                                   | - | 1164426 |         |         | 1164397 | cis-asRNA(~ 3'end)                           | 761  | 1136 | 0    | 0    | 0         | ↓↓↓ |
| rodA                              | MW2007        | Cell division protein RodA                                                                        | + |         | 2167408 | 2168610 |         |                                              | 30   | 46   | 0    | 0    | 1,05E-113 | ↓   |
| -                                 | Predicted RNA | Antisense: rodA                                                                                   | - | 2167562 |         |         | 2167541 | cis-asRNA (~5' end)                          | 761  | 1136 | 0    | 0    | 0         | ↓↓↓ |
| -                                 | MW2071        | Lytic regulatory protein                                                                          | + |         | 2224956 | 2226047 |         |                                              | 0    | 0    | 32   | 52   | 0         | ↑   |
| -                                 | Predicted RNA | Antisense: spoVG Putative septation protein SpoVG                                                 | - | 511742  |         |         | 511715  | cis-asRNA (~5' end)                          | 761  | 1136 | 0    | 0    | 0         | ↓↓↓ |
| <b>Transporter</b>                |               |                                                                                                   |   |         |         |         |         |                                              |      |      |      |      |           |     |
| -                                 | MW0539        | MW0539 amino acid permease                                                                        | + |         | 624466  | 625950  |         |                                              | 0    | 0    | 37   | 60   | 0         | ↑   |
| -                                 | MW0585        | Putative monovalent cation/H+ antiporter subunit A                                                | + |         | 666582  | 668984  |         |                                              | 9    | 13   | 0    | 0    | 0         | ↓   |
| -                                 | MW0586        | Putative monovalent cation/H+ antiporter subunit B                                                | + |         | 668971  | 669396  |         |                                              | 39   | 58   | 0    | 0    | 0         | ↓   |
| -                                 | MW0587        | Putative monovalent cation/H+ antiporter subunit C                                                | + |         | 669393  | 669737  |         |                                              | 57   | 85   | 0    | 0    | 0         | ↓   |
| -                                 | MW0588        | Putative monovalent cation/H+ antiporter subunit D                                                | + |         | 669727  | 671223  |         |                                              | 10   | 15   | 0    | 0    | 0         | ↓   |

|                         |               |                                                                                  |   |         |         |         |         |                      |      |      |      |      |          |     |
|-------------------------|---------------|----------------------------------------------------------------------------------|---|---------|---------|---------|---------|----------------------|------|------|------|------|----------|-----|
| aapA                    | MW1640        | D-serine/D-alanine/glycine transporter                                           | + |         | 1771567 | 1772928 |         |                      | 15   | 22   | 0    | 0    | 0        | ↓   |
| oppF                    | MW0181        | Oligopeptide transport ATP-binding protein                                       | - |         | 212968  | 211376  |         |                      | 15   | 23   | 0    | 0    | 0        | ↓   |
| oppD                    | MW0870        | OppD                                                                             | + |         | 959996  | 961078  |         |                      | 17   | 26   | 0    | 0    | 0        | ↓   |
| tcyC                    | MW2334        | TcyC – AA transporter                                                            | - |         | 2483511 | 2482780 |         |                      | 23   | 35   | 0    | 0    | 0        | ↓   |
| tcyA                    | MW2336        | TcyA – AA transporter                                                            | - |         | 2484987 | 2484208 |         |                      | 0    | 0    | 98   | 160  | 0        | ↑↑  |
| -                       | Predicted RNA | Antisense: MW2336 (tcyA)                                                         | + | 2484179 |         |         | 2484243 | cis-asRNA (~ 5' end) | 0    | 0    | 651  | 1057 | 0        | ↑↑↑ |
| -                       | Predicted RNA | Antisense: tcyP                                                                  | + | 405895  |         |         | 405927  | cis-asRNA (internal) | 0    | 0    | 1099 | 1785 | 0        | ↑↑↑ |
| Glycopeptide resistance |               |                                                                                  |   |         |         |         |         |                      |      |      |      |      |          |     |
| tcaA                    | MW2277        | TcaA                                                                             | - |         | 2424763 | 2423381 |         |                      | 0    | 0    | 33   | 54   | 0        | ↑   |
| tcaB                    | MW2358        | TcaB                                                                             | + |         | 2706933 | 2705563 |         |                      | 0    | 15   | 5    | 131  | 0,001178 | ↑↑  |
| gdpP                    | MW0014        | GdpP                                                                             | + |         | 18322   | 20289   |         |                      | 10   | 15   | 0    | 0    | 0        | ↓   |
| PURINE                  |               |                                                                                  |   |         |         |         |         |                      |      |      |      |      |          |     |
| purL                    | MW0952        | Phosphoribosylformylglycinamide synthase II                                      | + |         | 1046476 | 1048665 |         |                      | 0    | 0    | 49   | 79   | 0        | ↑   |
| -                       | predicted RNA | Antisense: purK                                                                  | - | 1044556 |         |         | 1044512 | cis-asRNA (~ 3' end) | 0    | 0    | 1209 | 1964 | 0        | ↑↑↑ |
| PYRIMIDINE              |               |                                                                                  |   |         |         |         |         |                      |      |      |      |      |          |     |
| pyrR                    | MW1081        | Bifunctional pyrimidine regulatory protein PyrR uracil phosphoribosyltransferase | + |         | 1177585 | 1178112 |         |                      | 33   | 49   | 0    | 0    | 0        | ↓   |
| pyrP                    | MW1082        | Uracil permease                                                                  | + |         | 1178330 | 1179637 |         |                      | 17   | 26   | 0    | 0    | 0        | ↓   |
| pyrAA                   | MW1085        | Carbamoyl phosphate synthase small subunit                                       | + |         | 1178330 | 1179637 |         |                      | 5    | 143  | 44   | 1163 | 0,002787 | ↑↑↑ |
| pyrH                    | MW1141        | Uridylate kinase                                                                 | + |         | 1247297 | 1248019 |         |                      | 23   | 34   | 0    | 0    | 0        | ↓   |
| -                       | predicted RNA | Antisense: pykA                                                                  | + | 1774446 |         |         | 1774466 | cis-asRNA (internal) | 761  | 1136 | 0    | 0    | 0        | ↓↓↓ |
|                         | predicted RNA | Antisense: pyrG                                                                  | + | 2204490 |         |         | 2204578 | cis-asRNA (~ 3' end) | 0    | 0    | 809  | 1314 | 0        | ↑↑↑ |
| upp                     | MW2036        | Uracil phosphoribosyltransferase                                                 | - |         | 2190665 | 2190036 |         |                      | 0    | 0    | 94   | 153  | 0        | ↑↑  |
| -                       | predicted RNA | Antisense: upp                                                                   | + | 2190357 |         |         | 2190384 | cis-asRNA (internal) | 1386 | 2069 | 0    | 0    | 0        | ↓↓↓ |
| REGULATORS              |               |                                                                                  |   |         |         |         |         |                      |      |      |      |      |          |     |
| walR                    | MW0018        | Response regulator walR                                                          | + |         | 24930   | 25631   |         |                      | 27   | 40   | 0    | 0    | 0        | ↓   |
| walK                    | MW0019        | Two-component sensor histidine kinase walk                                       | + |         | 25644   | 27470   |         |                      | 23   | 35   | 0    | 0    | 0        | ↓   |
| -                       | predicted RNA | Antisense: walH                                                                  | - | 28620   |         |         | 28601   | cis-asRNA (internal) | 761  | 1136 | 0    | 0    | 2,97E-08 | ↓↓↓ |
| -                       | predicted RNA | Antisense: walJ                                                                  | - | 30497   |         |         | 30475   | cis-asRNA (~3' end)  | 761  | 1136 | 0    | 0    | 0        | ↓↓↓ |
| sarH1                   | MW0085        | SarS                                                                             | - |         | 102180  | 101428  |         |                      | 26   | 39   | 0    | 0    | 0        | ↓   |
| -                       | Predicted RNA | Antisense:sarZ                                                                   | - | 2456896 |         |         | 2456819 | cis-asRNA (internal) | 0    | 0    | 606  | 984  | 0        | ↑↑↑ |

|      |               |                                       |   |         |         |         |         |                                        |      |       |      |      |          |     |
|------|---------------|---------------------------------------|---|---------|---------|---------|---------|----------------------------------------|------|-------|------|------|----------|-----|
| -    | Predicted RNA | Antisense: rpoB                       | - | 570795  |         |         | 570766  | cis-asRNA (~5' end)                    | 1522 | 2272  | 0    | 0    | 0        | ↓↓↓ |
| -    | Predicted RNA | Antisense: rpoB                       | - | 571119  |         |         | 571095  | cis-asRNA (internal)                   | 0    | 0     | 1561 | 2535 | 0        | ↑↑↑ |
| -    | Predicted RNA | Antisense: rpoC                       | - | 577326  |         |         | 577301  | cis-asRNA (~3' end)                    | 0    | 0     | 2114 | 3434 | 0        | ↑↑↑ |
| -    | Predicted RNA | Antisense: vraB                       | - | 619523  |         |         | 619499  | cis-asRNA (internal)                   | 0    | 0     | 2572 | 4178 | 0        | ↑↑↑ |
| -    | Predicted RNA | Antisense: vraB                       | - | 619939  |         |         | 619809  | cis-asRNA (internal)                   | 0    | 0     | 553  | 899  | 0        | ↑↑  |
| -    | Predicted RNA | Antisense: vraB                       | - | 620196  |         |         | 620148  | cis-asRNA (~3' end)                    | 0    | 0     | 919  | 1494 | 0        | ↑↑↑ |
| -    | Predicted RNA | Antisense: vraC vraB                  | - | 620380  |         |         | 620264  | Trans-sRNA intergenic region vraC vraB | 0    | 0     | 404  | 656  | 0        | ↑↑  |
| -    | Predicted RNA | Antisense: vraX                       | + | 621196  |         |         | 621257  | cis-asRNA (~5' end)                    | 0    | 0     | 594  | 964  | 0        | ↑↑↑ |
| graR | MW0621        | GraR                                  | + |         | 703600  | 704274  |         |                                        | 32   | 48    | 0    | 0    | 0        | ↓   |
| -    | Predicted RNA | Antisense: vraF                       | - | 706093  |         |         | 706046  | cis-asRNA (~3' end)                    | 0    | 0     | 1042 | 1692 | 0        | ↑↑↑ |
| saeR | MW0668        | Response regulator saeR               | - |         | 752654  | 751968  |         |                                        | 0    | 0     | 89   | 145  | 0        | ↑↑  |
| -    | Predicted RNA | Antisense: saeS                       | + | 750905  |         |         | 750970  | cis-asRNA (~3' end)                    | 0    | 0     | 2948 | 4788 | 0        | ↑↑↑ |
| -    | Predicted RNA | Antisense: saeS                       | + | 751289  |         |         | 751315  | cis-asRNA (~5' end)                    | 761  | 1136  | 0    | 0    | 0        | ↓↓↓ |
| codY | MW1138        | Transcriptional repressor CodY        | + |         | 1244215 | 1244988 |         |                                        | 39   | 58    | 0    | 0    | 0        | ↓   |
| -    | Predicted RNA | Antisense: sigA                       | + | 1641370 |         |         | 1641389 | cis-asRNA (~3' end)                    | 761  | 1136  | 0    | 0    | 2,97E-08 | ↓↓↓ |
| rot  | MW1705        | Repressor of toxins Rot               | - |         | 1860076 | 1859615 |         |                                        | 0    | 0     | 72   | 117  | 1,87E-03 | ↑↑  |
| vraR | MW1824        | Two-component response regulator      | - |         | 1987943 | 1987314 | 1987314 |                                        | 0    | 0     | 232  | 378  | 0        | ↑↑  |
| -    | Predicted RNA | Antisense: vraR                       | + | 1987481 |         |         | 1987528 | cis-asRNA (internal)                   | 761  | 1136  | 0    | 0    | 0        | ↓↓↓ |
| vraS | MW1825        | Two-component sensor histidine kinase | - |         | 1988976 | 1987933 |         |                                        | 0    | 0     | 270  | 438  | 0        | ↑↑  |
| vraT | MW1826        | VraT                                  | - | 1989688 | 1989674 | 1988973 |         |                                        | 0    | 0     | 247  | 401  | 0        | ↑↑  |
| vraU | MW1827        | VraU                                  | - |         | 1990075 | 1989689 |         |                                        | 0    | 0     | 92   | 149  | 0        | ↑↑  |
| hld  | MW1959        | Delta-hemolysin                       | - | 2107813 | 2107813 | 2107679 | 2107679 |                                        | 1685 | 2516  | 0    | 0    | 0        | ↓↓↓ |
| agrB | MW1960        | Accessory gene regulator B            | + |         | 2108049 | 2108612 |         |                                        | 130  | 195   | 0    | 0    | 0        | ↓↓  |
| agrC | MW1962        | AgrC                                  | + |         | 2108781 | 2110073 |         |                                        | 8    | 212   | 0    | 0    | 0        | ↓   |
| agrA | MW1963        | AgrA                                  | + | 2110092 | 2110092 | 2110808 | 2110808 |                                        | 27   | 717   | 0    | 11   | 2,57E-57 | ↓   |
| -    | Predicted RNA | Antisense: agrB                       | - | 2108052 |         |         | 2108025 | trans-acting agrB                      | 6794 | 10146 | 0    | 0    | 0        | ↓↓↓ |
| -    | Predicted RNA | Antisense: agrB                       | - | 2108168 |         |         | 2108132 | cis-asRNA (~5' end)                    | 1522 | 2272  | 0    | 0    | 0        | ↓↓↓ |
| -    | Predicted RNA | Antisense: agrB                       | - | 2108441 |         |         | 2108405 | cis-asRNA (internal)                   | 987  | 1474  | 0    | 0    | 0        | ↓↓↓ |
| -    | Predicted RNA | Antisense: agrD                       | - | 2108703 |         |         | 2108652 | cis-asRNA (~3' end)                    | 2883 | 4305  | 0    | 0    | 0        | ↓↓↓ |
| -    | Predicted RNA | Antisense: agrC                       | - | 2108870 |         |         | 2108826 | cis-asRNA (internal)                   | 761  | 1136  | 0    | 0    | 6,92E-94 | ↓↓↓ |

|    |               |                 |   |         |  |  |         |                       |      |       |    |     |          |     |
|----|---------------|-----------------|---|---------|--|--|---------|-----------------------|------|-------|----|-----|----------|-----|
| -  | Predicted RNA | Antisense: agrC | - | 2109347 |  |  | 2109286 | cis-asRNA (internal)  | 1595 | 2382  | 0  | 0   | 0        | ↓↓↓ |
| -  | Predicted RNA | Antisense: agrC | - | 2109526 |  |  | 2109477 | cis-asRNA (internal)  | 2283 | 3409  | 0  | 0   | 0        | ↓↓↓ |
| -  | Predicted RNA | Antisense: agrC | - | 2109667 |  |  | 2109635 | cis-asRNA (internal ) | 1475 | 2203  | 0  | 0   | 0        | ↓↓↓ |
| -  | Predicted RNA | Antisense: agrC | - | 2109822 |  |  | 2109768 | cis-asRNA (intrernal) | 1784 | 2665  | 0  | 0   | 0        | ↓↓↓ |
| -  | Predicted RNA | Antisense: agrC | - | 2110013 |  |  | 2109950 | cis-asRNA (~3' end)   | 927  | 1384  | 0  | 0   | 0        | ↓↓↓ |
| -  | Predicted RNA | Antisense: agrA | - | 2110216 |  |  | 2110191 | cis-asRNA (~5' end))  | 761  | 1136  | 0  | 0   | 0        | ↓↓↓ |
| -  | Predicted RNA | Antisense: agrA | - | 2110451 |  |  | 2110304 | cis-asRNA (internal)  | 7666 | 11448 | 81 | 132 | 1,06E-82 | ↓↓↓ |
| -  | Predicted RNA | Antisense: agrA | - | 2110603 |  |  | 2110531 | cis-asRNA (internal)  | 500  | 747   | 0  | 0   | 0        | ↓↓  |
| -P | Predicted RNA | Antisense: agrA | - | 2110719 |  |  | 2110696 |                       | 1426 | 2130  | 0  | 0   | 6,92E-94 | ↓↓↓ |

Legend. Red, DE coding genes; black, DE antisense small RNA; bold, overexpression trend.

Differential expression rate: ↑/↓-low, ↑↑/↓↓-medium, ↑↑↑/↓↓↓-high differential expression

Table S2. Comparative Analysis of the nsSNPs in intergenic genomic regions in 1R vs. 1S.

| Genomic Localization | Nucleotide | nsSNPs | Locus Tag           | Effect Prediction |
|----------------------|------------|--------|---------------------|-------------------|
| Intergenic region    | 636844     | A>C    | MW0550-MW0551       | Modifier          |
| Intergenic region    | 648981     | T>G    | MW0564-MW0565       | Modifier          |
| Intergenic region    | 825243     | C>A    | <i>rsaH</i> -MW0732 | Modifier          |
| Intergenic region    | 919233     | A>T    | MW0836-MW0837       | Modifier          |
| Intergenic region    | 940658     | T>C    | MW0850-MW0851       | Modifier          |
| Intergenic region    | 1209748    | A>T    | MW1109- <i>recG</i> | Modifier          |
| Intergenic region    | 2202656    | G>T    | <i>murZ-fbaA</i>    | Modifier          |
| Intergenic region    | 2377514    | T>C    | MW2229-MW2230       | Modifier          |
